# Supplementary material for: Laboratory Studies about Microplastic Aging and Its Effects on the Adsorption of Chlorpyrifos
Source: MDPI journal article supplement (doi:10.3390/polym15163468), 2023-08-19
Supplement: s1 [file s1]

Article

# Laboratory studies about microplastic aging and its effects on the adsorption of chlorpyrifos

Sílvia D. Martinho <sup>1,2</sup>, Vírginia Cruz Fernandes <sup>1,\*</sup>, Sónia A. Figueiredo <sup>1,\*</sup>, Rui Vilarinho <sup>3,4</sup>, J. Agostinho Moreira <sup>3,4</sup> and Cristina Delerue-Matos <sup>1</sup>

<sup>1</sup> REQUIMTE/LAQV – ISEP, Polytechnic of Porto, Rua Dr. António Bernardino de Almeida 431, 4249-015, Porto, Portugal

<sup>2</sup> Departamento de Química, Faculdade de Ciências, Universidade do Porto, rua do Campo Alegre s/n, 4169–007 Porto, Portugal.

<sup>3</sup> Department of Physics and Astronomy, Faculty of Sciences of the Porto University, Porto, Portugal

<sup>4</sup> IFIMUP – Institute of Physics for Advanced Materials, Nanotechnology and Photonics, Faculty of Sciences of the University of Porto, Porto, Portugal

\* Correspondence: vir@isep.ipp.pt/saf@isep.ipp.pt; Tel.: +351 228340500

## Supplementary Materials:

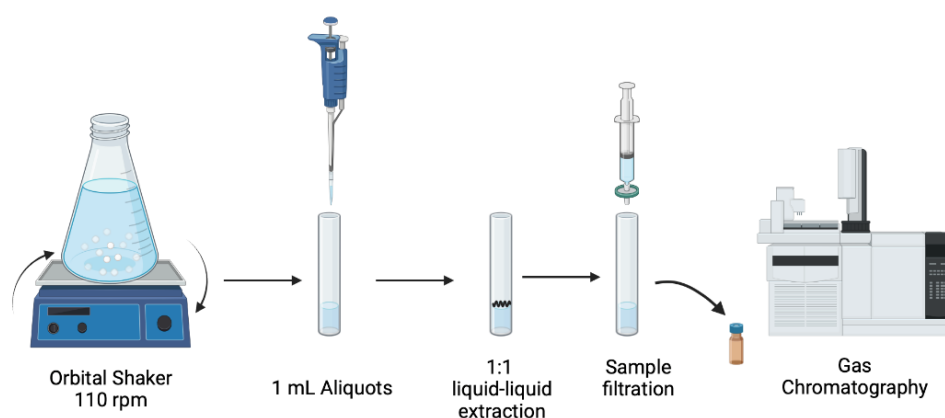

**Figure S1.** Schematic diagram of adsorption experiments.

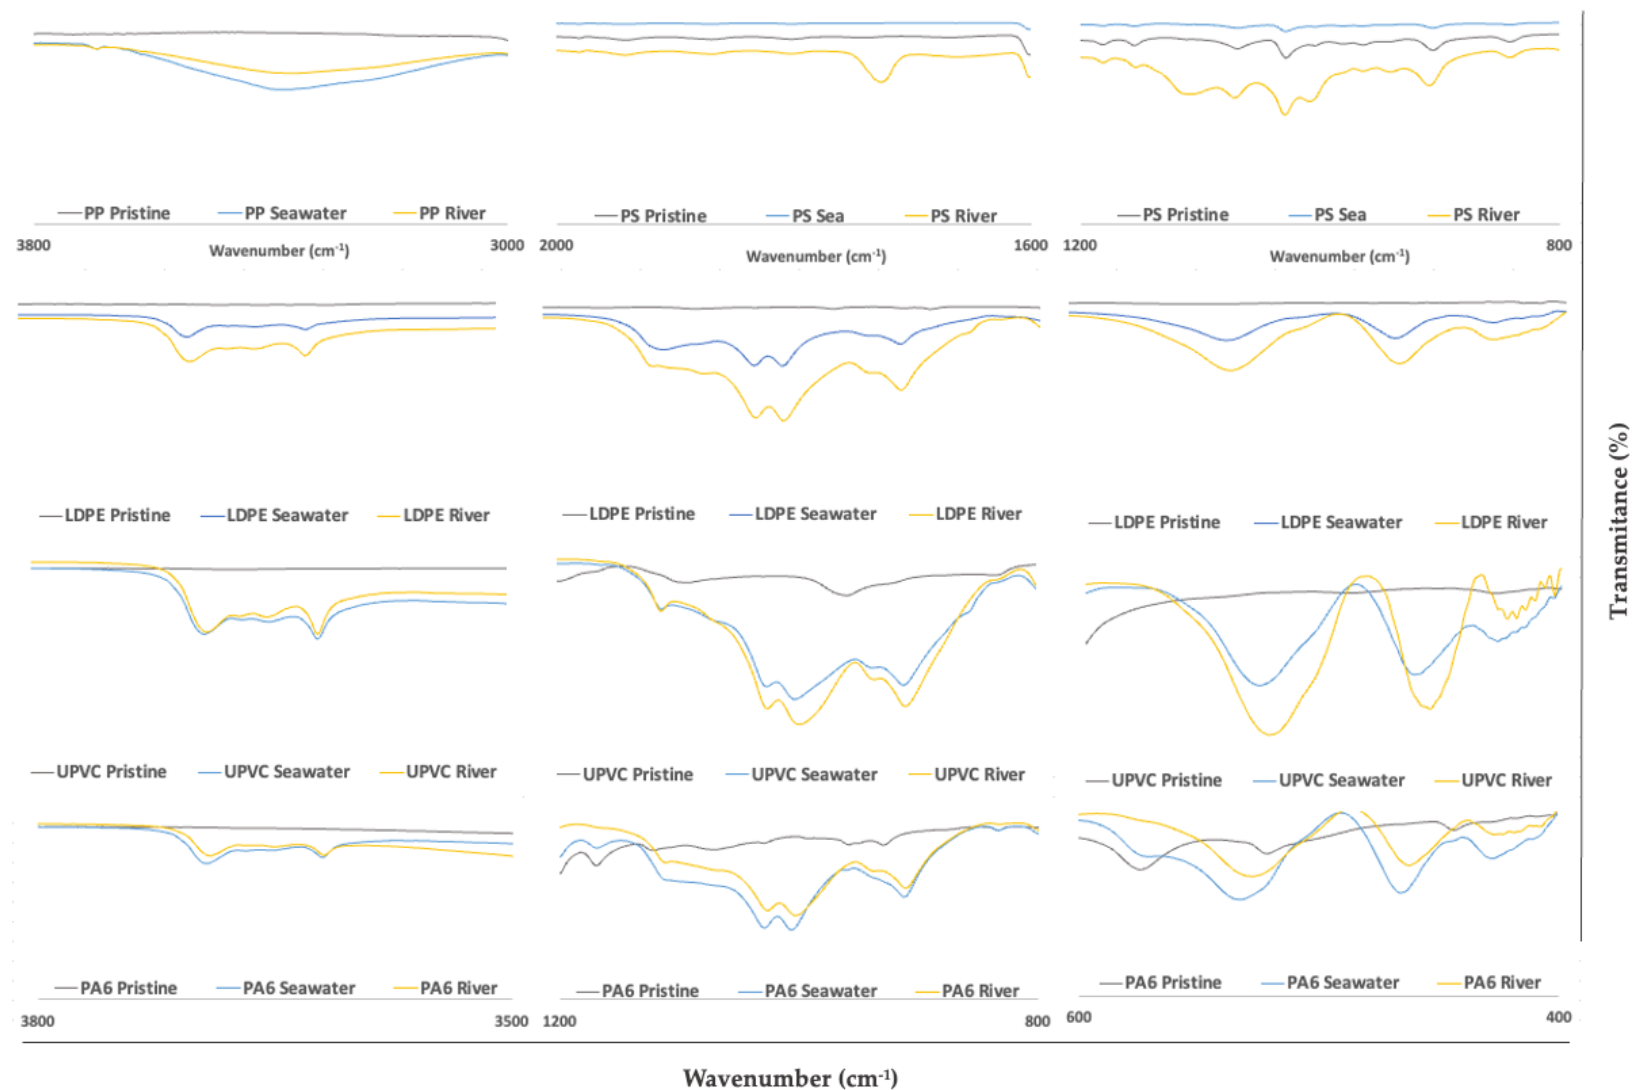

**Figure S2.** Expanded FTIR spectra of the 6 MP, pristine, seawater and river water aging systems.

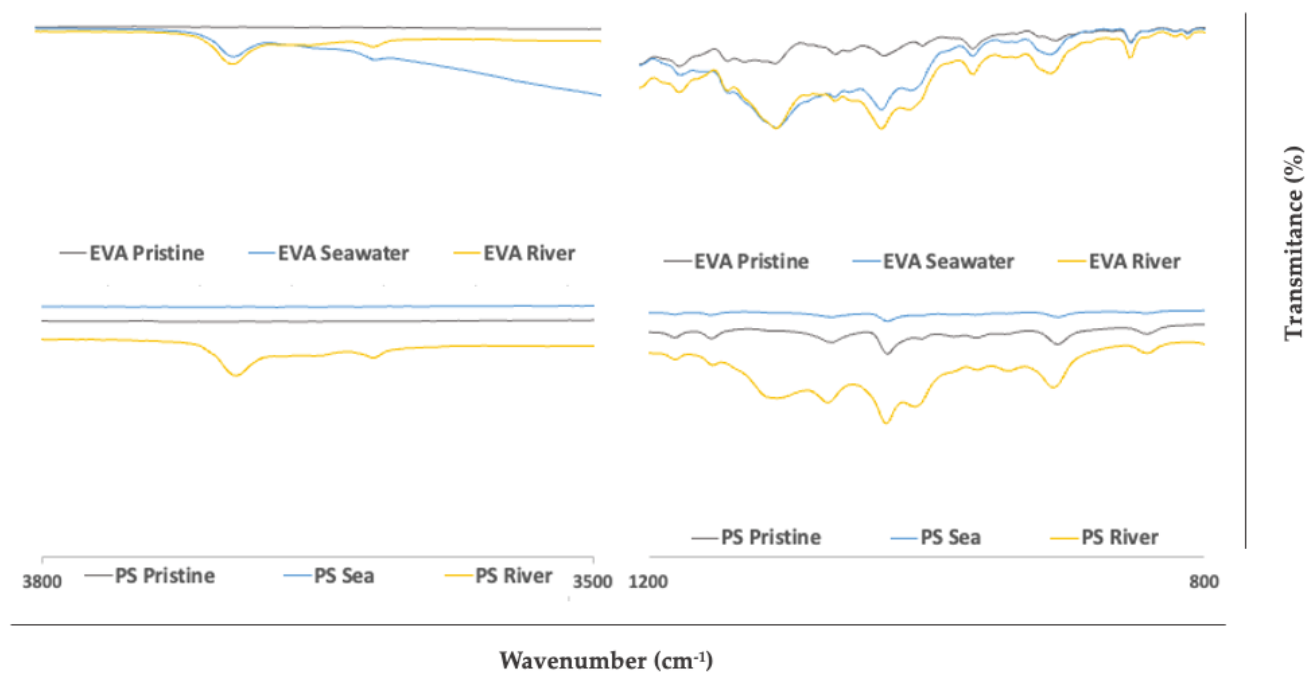

**Figure S2.** Expanded FTIR spectra of the 6 MP, pristine, seawater and river water aging systems (Cont.).

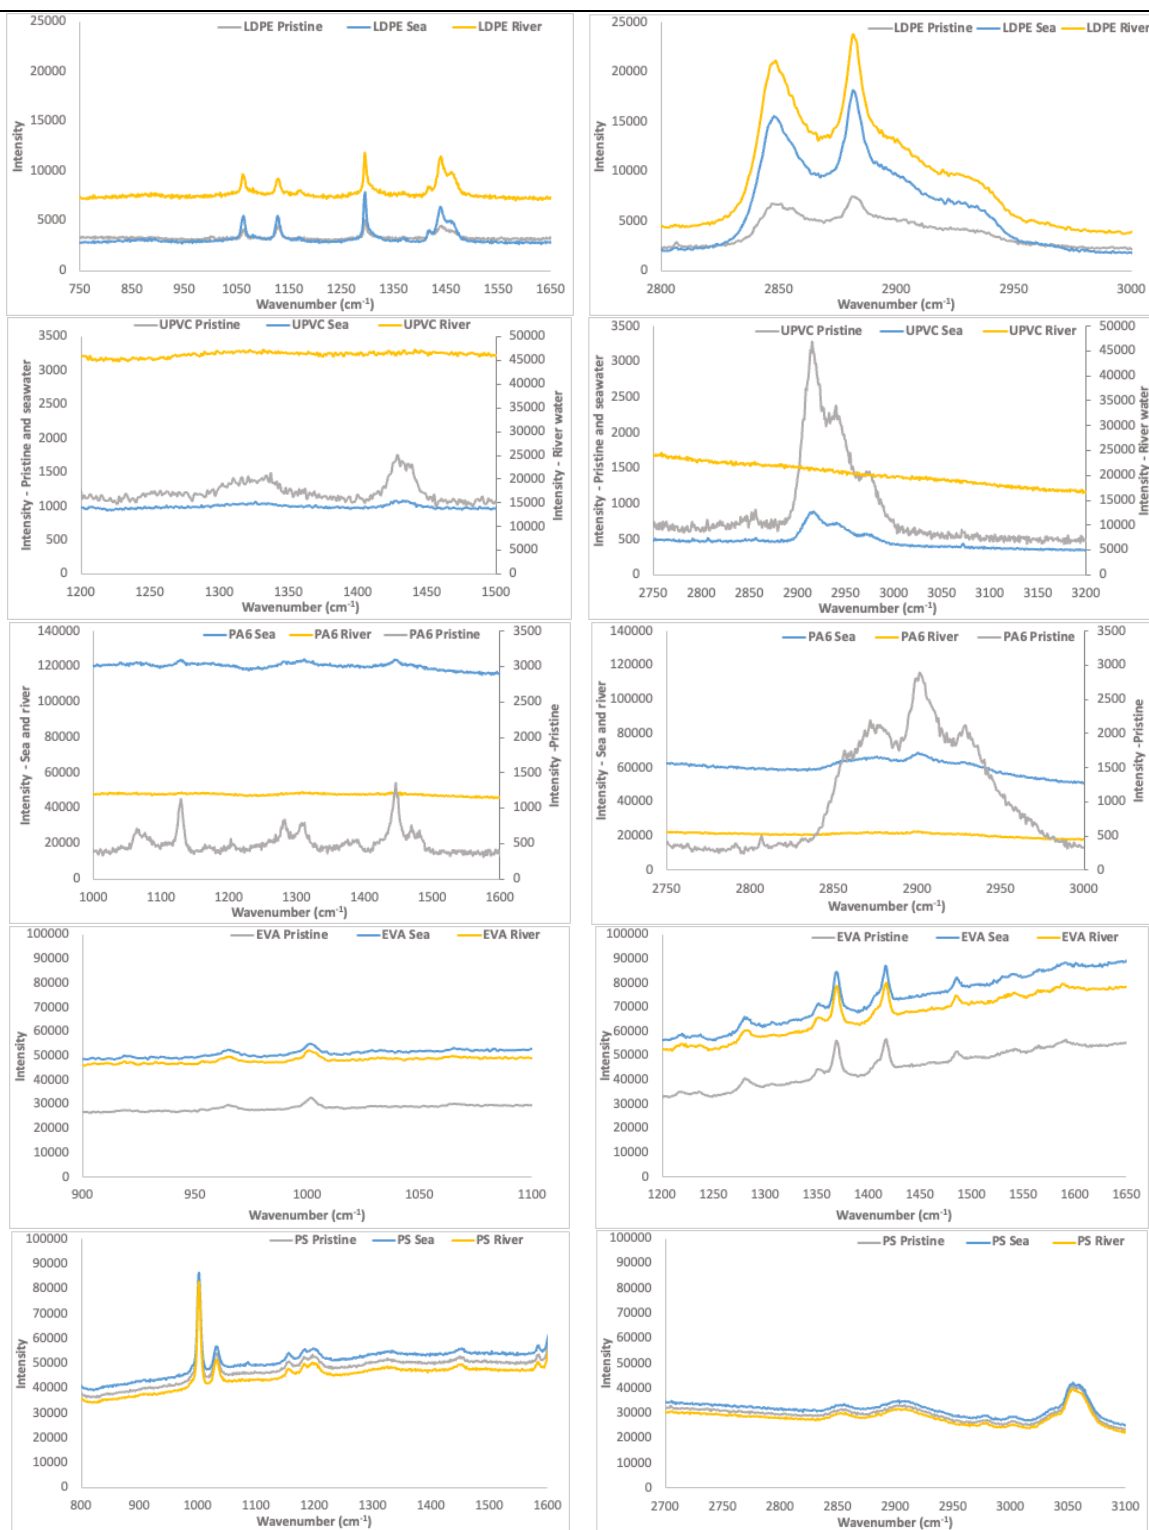

**Figure S3.** Expanded Raman spectra of the 6 MP, pristine, seawater and river water aging systems.

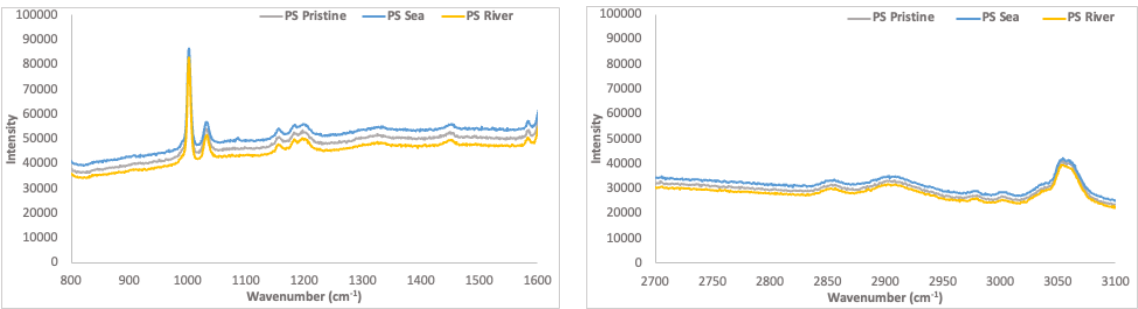

**Figure S3.** Expanded Raman spectra of the 6 MP, pristine, seawater and river water aging systems (Cont.).
